# Supplementary material for: Welfare in Nile Tilapia Production: Dorsal Fin Erection as a Visual Indicator for Insensibility
Source: MDPI journal article supplement (doi:10.3390/ani11103007), 2021-10-19
Supplement: s1 [file s1]

## Supplementary Materials

**Table S1.** Water saturation by free and total CO<sub>2</sub> over time.

| <b>Time (min)</b>                  | <b>0</b>    | <b>5</b> | <b>8</b> | <b>10</b> |
|------------------------------------|-------------|----------|----------|-----------|
| <b>Total CO<sub>2</sub> (mg/L)</b> | 2.11 ± 1.17 | 24.69    | 39.25    | 40.32     |
| <b>Free CO<sub>2</sub> (mg/L)</b>  | 0.48 ± 0.12 | 22.57    | 36.45    | 39.32     |
